# Supplementary material for: Gut microbiota in hospitalized children with acute infective gastroenteritis caused by virus or bacteria in a regional Peruvian hospital
Source: PeerJ journal article supplement (doi:10.7717/peerj.9964), 2020-11-03
Supplement: Suplementary_material-_Table_S1_2020.pdf [file Suplementary_material-_Table_S1_2020.pdf]

| <b>Gut Microbiota</b>         | <b>Virus<br/>(n=51)</b> | <b>Virus-Virus<br/>(n=13)</b> | <b>Virus- Bacteria<br/>(n=28)</b> | <b>Bacteria<br/>(n=18)</b> | <b>Bacteria-Bacteria<br/>(n=6)</b> |
|-------------------------------|-------------------------|-------------------------------|-----------------------------------|----------------------------|------------------------------------|
| <i>Firmicutes</i> (n=74)      | 43/51                   | 11/13                         | 26/28                             | 15/18                      | 6/6                                |
| <i>Bacteroidetes</i> (n=73)   | 42/51                   | 12/13                         | 25/28                             | 16/18                      | 6/6                                |
| <i>Lactobacillus</i> (n=70)   | 45/51                   | 12/13                         | 9/28                              | 13/18                      | 6/6                                |
| <i>Prevotella</i> (n=67)      | 39/51                   | 11/13                         | 25/28                             | 13/18                      | 5/6                                |
| <i>Proteobacterium</i> (n=63) | 37/51                   | 12/13                         | 25/28                             | 11/18                      | 2/6                                |
| <i>Bacteriodes</i> (n=52)     | 33/51                   | 12/13                         | 16/28                             | 7/18                       | 3/6                                |
| <i>Clostridium</i> (n=29)     | 23/51                   | 9/13                          | 15/28                             | 5/18                       | 2/6                                |
| <i>Veillonella</i> (n=29)     | 24/51                   | 8/13                          | 13/28                             | 7/18                       | 1/6                                |
| <i>Eubacterium</i> (n=24)     | 18/51                   | 10/13                         | 9/28                              | 4/18                       | 0/6                                |
| <i>Bifidobacterium</i> (n=22) | 15/51                   | 4/13                          | 5/28                              | 6/18                       | 1/6                                |
| <i>Actinobacterium</i> (n=20) | 16/51                   | 4/13                          | 7/28                              | 3/18                       | 0/6                                |
| <i>Enterococcus</i> (n=15)    | 7/51                    | 2/13                          | 3/28                              | 4/18                       | 0/6                                |
| <i>Fusobacterium</i> (n=8)    | 3/51                    | 9/13                          | 3/28                              | 2/18                       | 2/6                                |

Eliminado: Table S1. Gut Microbiota detected in patients with co-infections in acute gastroenteritis ( $\chi^2$ -Test,  $p > 0.05$ ).
